# Supplementary material for: Identification and Prognostic Value Exploration of Radiotherapy Sensitivity‐Associated Genes in Non‐Small‐Cell Lung Cancer
Source: Hindawi journal article supplement (doi:10.1155/2021/5963868), 2021-01-01

Response ▢ Disease\_progression ▢ Partial\_response ▢ Complete\_response ▢ Stable\_disease

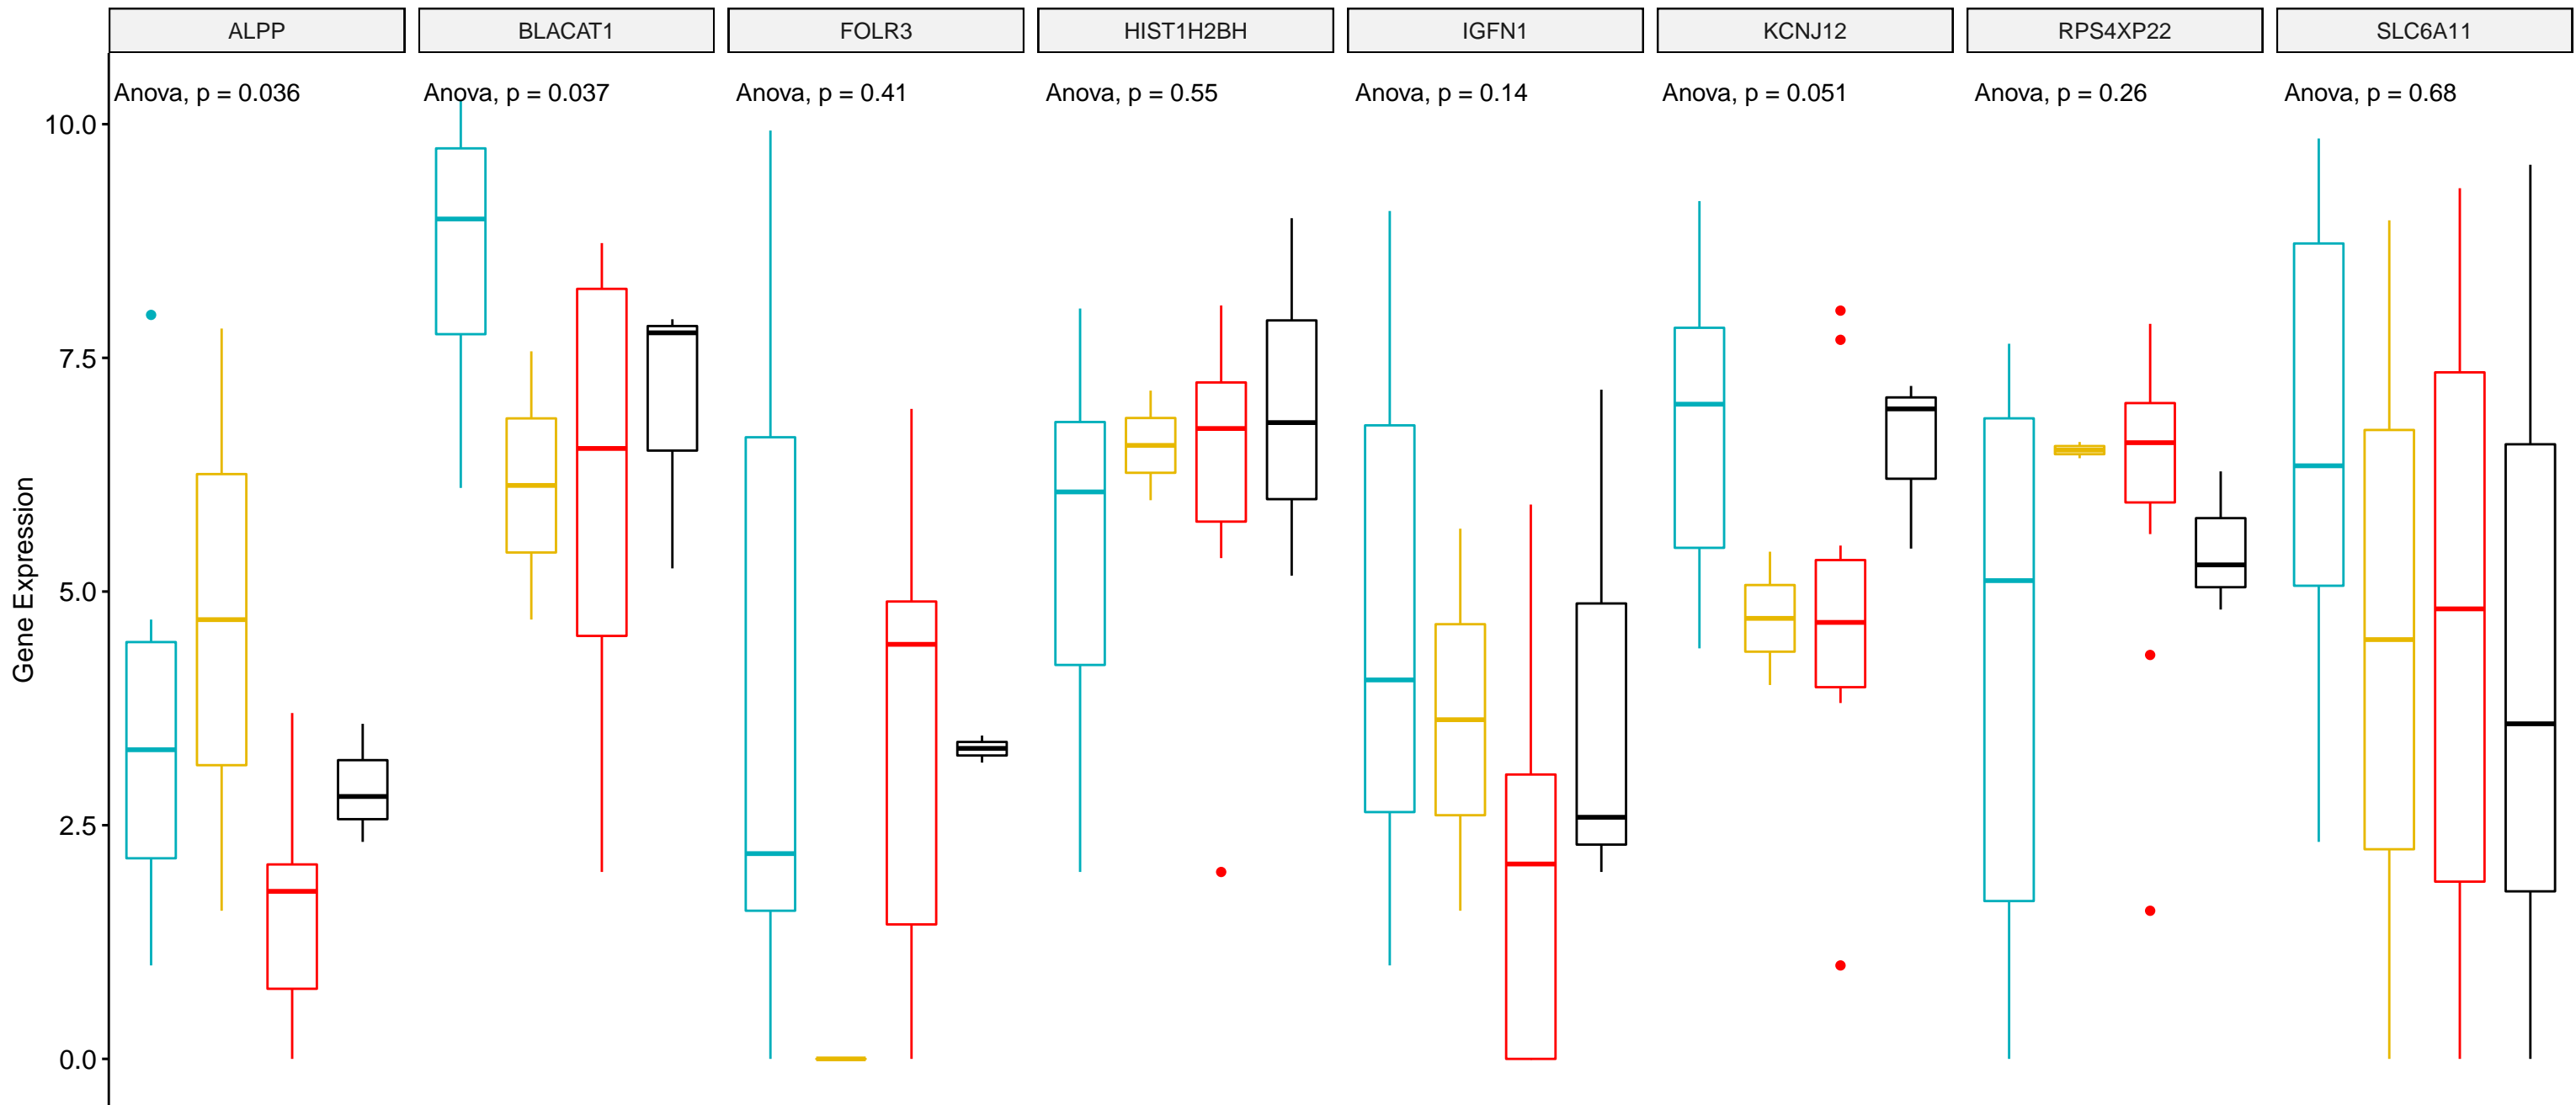

Supplement: f1 [file 5963868.f1.pdf]
